# Supplementary material
Source: Springer Nature journal article supplement (https://www.springermedizin.de/resource/supplementary/13054_2009_8317_MOESM5_ESM.pdf/9731690)

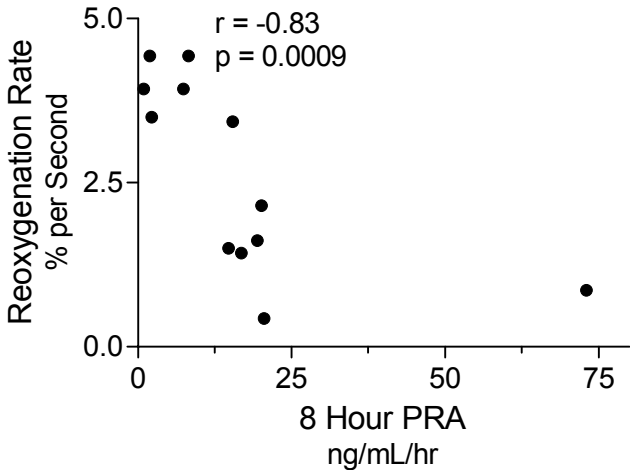

Supplement: MOESM5 [file 9731690]
